# Supplementary material
Source: ML conference proceedings conference paper supplement (https://proceedings.neurips.cc/paper_files/paper/2014/hash/afda332245e2af431fb7b672a68b659d-Abstract.html)
Supplement: Supplementary file [file afda332245e2af431fb7b672a68b659d-Supplemental.zip]

---

# Decomposing Parameter Estimation Problems

---

**Khaled S. Refaat, Arthur Choi, Adnan Darwiche**  
 Computer Science Department  
 University of California, Los Angeles  
 {krefaat, aychoi, darwiche}@cs.ucla.edu

**Proposition 1** *The likelihood function  $L(\theta|\mathcal{D})$  does not depend on the parameters of variable  $X$  if  $X$  is hidden in dataset  $\mathcal{D}$  and is a leaf of the network structure.*

**Proof** If  $\mathbf{d}_i$  is an example of dataset  $\mathcal{D}$ , then  $Pr_\theta(\mathbf{d}_i)$  does not depend on the parameters of variable  $X$ ; see [1, Chapter 6]. Hence, the likelihood function  $L(\theta|\mathcal{D}) = \prod_{i=1}^N Pr_\theta(\mathbf{d}_i)$  does not depend on the parameters of variable  $X$ .  $\square$

## 1 Soundness

### 1.1 Decomposing the Likelihood Function

**Theorem 1** *Let  $\mathbf{S}$  be a component of  $G|\mathbf{O}$  and let  $\mathbf{R}$  be the remaining variables of network  $G$ . If variables  $\mathbf{O}$  are observed in example  $\mathbf{d}$ , we have*

$$Pr_\theta(\mathbf{d}) = \left[ \sum_{\Theta_{\mathbf{S}}^{\mathbf{d}}} \Theta_{\mathbf{S}}^{\mathbf{d}} \right] \left[ \sum_{\Theta_{\mathbf{R}}^{\mathbf{d}}} \Theta_{\mathbf{R}}^{\mathbf{d}} \right].$$

**Proof** Let  $\mathbf{N} = \mathbf{S} \cup \mathbf{R}$  be all network variables. One can show that the product  $\Theta_{\mathbf{S}}^{\mathbf{d}} \Theta_{\mathbf{R}}^{\mathbf{d}}$  is a parameter term for  $\mathbf{N}$  and  $\mathbf{d}$ . Moreover, one can show that every parameter term for  $\mathbf{N}$  and  $\mathbf{d}$  can be written as  $\Theta_{\mathbf{S}}^{\mathbf{d}} \Theta_{\mathbf{R}}^{\mathbf{d}}$ . The key observation here is that if variable  $X$  is shared by some parameter in  $\Theta_{\mathbf{S}}^{\mathbf{d}}$  and some parameter in  $\Theta_{\mathbf{R}}^{\mathbf{d}}$ , then  $X \in \mathbf{O}$  and its value must be set by example  $\mathbf{d}$ . Hence, the parameters of  $\Theta_{\mathbf{S}}^{\mathbf{d}}$  and those of  $\Theta_{\mathbf{R}}^{\mathbf{d}}$  must be compatible. Hence, one can enumerate all parameter terms  $\Theta_{\mathbf{N}}^{\mathbf{d}}$  by enumerating all products  $\Theta_{\mathbf{S}}^{\mathbf{d}} \Theta_{\mathbf{R}}^{\mathbf{d}}$ :

$$Pr_\theta(\mathbf{d}) = \sum_{\Theta_{\mathbf{N}}^{\mathbf{d}}} \Theta_{\mathbf{N}}^{\mathbf{d}} = \sum_{\Theta_{\mathbf{S}}^{\mathbf{d}}} \sum_{\Theta_{\mathbf{R}}^{\mathbf{d}}} \Theta_{\mathbf{S}}^{\mathbf{d}} \Theta_{\mathbf{R}}^{\mathbf{d}} = \left[ \sum_{\Theta_{\mathbf{S}}^{\mathbf{d}}} \Theta_{\mathbf{S}}^{\mathbf{d}} \right] \left[ \sum_{\Theta_{\mathbf{R}}^{\mathbf{d}}} \Theta_{\mathbf{R}}^{\mathbf{d}} \right].$$

$\square$

### 1.2 Optimizing Component Likelihoods

**Theorem 2** *Consider a sub-network  $G$  which is induced by component  $\mathbf{S}$  and boundary variables  $\mathbf{B}$ . Let  $\theta$  be the parameters of sub-network  $G$ , and let  $\mathcal{D}$  be a dataset for  $G$  that observes boundary variables  $\mathbf{B}$ . Then  $\theta^*$  is a stationary point for the sub-network likelihood,  $L(\theta|\mathcal{D})$ , only if  $\theta^* : \mathbf{S}$  is a stationary point for the component likelihood  $L(\theta : \mathbf{S}|\mathcal{D})$ . Moreover, every stationary point for  $L(\theta : \mathbf{S}|\mathcal{D})$  is part of some stationary point for  $L(\theta|\mathcal{D})$ .*

**Proof** By definition of a sub-network,  $\mathbf{S}$  must be a component of  $G|\mathbf{B}$ . Hence, by Theorem 1,  $L(\theta|\mathcal{D}) = L(\theta : \mathbf{S}|\mathcal{D})L(\theta : \mathbf{B}|\mathcal{D})$ . Since  $\mathbf{S}$  and  $\mathbf{B}$  partition the variables of sub-network  $G$ , the parameters in  $\theta : \mathbf{S}$  do not overlap with those in  $\theta : \mathbf{B}$ , and their union accounts for all sub-network parameters,  $\theta$ . The theorem then follows immediately from Lemma 1.  $\square$

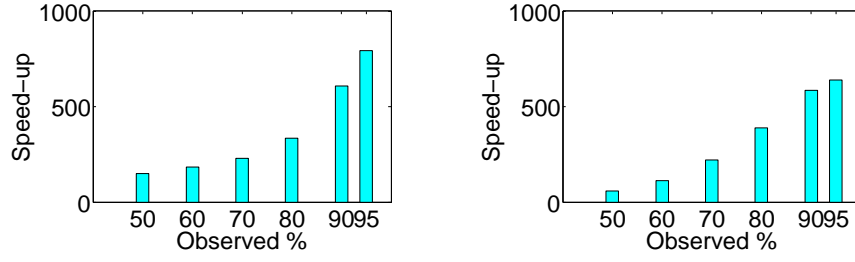

Figure 1: Speedup of D-EDML over EDML on chain networks: three chains (180, 380, and 500 variables) (left), and tree networks (63, 127, 255, and 511 variables) (right), with three random datasets per network/observed percentage, and  $2^{10}$  examples per dataset.

## 2 Results

Table 1 and Figure 1 show results for EDML.

| Network  | Observed % | Speed-up<br>D-EM | Speed-up<br>D-EDML |
|----------|------------|------------------|--------------------|
| alarm    | 95.0%      | 267.67x          | 33.93x             |
| alarm    | 90.0%      | 173.47x          | 218.09x            |
| alarm    | 80.0%      | 115.4x           | 85.1x              |
| alarm    | 70.0%      | 87.67x           | 34.06x             |
| alarm    | 60.0%      | 92.65x           | 31.83x             |
| alarm    | 50.0%      | 12.09x           | 6.42x              |
| win95pts | 95.0%      | 591.38x          | 49.25x             |
| win95pts | 90.0%      | 112.57x          | 43.43x             |
| win95pts | 80.0%      | 22.41x           | 17.97x             |
| win95pts | 70.0%      | 17.92x           | 14.64x             |
| win95pts | 60.0%      | 4.8x             | 8.4x               |
| win95pts | 50.0%      | 7.99x            | 16.7x              |
| andes    | 95.0%      | 155.54x          | 162.63x            |
| andes    | 90.0%      | 52.63x           | 90.5x              |
| andes    | 80.0%      | 14.27x           | 14.75x             |
| andes    | 70.0%      | 2.96x            | 6.24x              |
| andes    | 60.0%      | 0.77x            | 2.35x              |
| andes    | 50.0%      | 1.01x            | 2.47x              |
| diagnose | 95.0%      | 43.03x           | 127.24x            |
| diagnose | 90.0%      | 17.16x           | 49.69x             |
| diagnose | 80.0%      | 11.86x           | 21.32x             |
| diagnose | 70.0%      | 3.25x            | 11.54x             |
| diagnose | 60.0%      | 3.48x            | 8.72x              |
| diagnose | 50.0%      | 3.73x            | 9.79x              |
| water    | 95.0%      | 811.48x          | 88.41x             |
| water    | 90.0%      | 110.27x          | 70.0x              |
| water    | 80.0%      | 7.23x            | 5.34x              |
| water    | 70.0%      | 1.5x             | 1.55x              |
| water    | 60.0%      | 2.03x            | 1.82x              |
| water    | 50.0%      | 4.4x             | 3.79x              |
| pigs     | 95.0%      | 235.63x          | 40.7x              |
| pigs     | 90.0%      | 37.61x           | 10.77x             |
| pigs     | 80.0%      | 34.19x           | 11.17x             |
| pigs     | 70.0%      | 16.23x           | 5.18x              |
| pigs     | 60.0%      | 4.1x             | 1.82x              |
| pigs     | 50.0%      | 3.16x            | 1.69x              |

Table 1: D-EM over EM speed-ups and D-EDML over EDML speed-ups on UAI networks. Three random datasets per network/observed percentage with  $2^{10}$  examples per dataset.

## A Decomposing Stationary Points

A stationary point for function  $f(x_1, \dots, x_n)$  is a point  $x_1^*, \dots, x_n^*$  at which the gradient of  $f(x_1, \dots, x_n)$  evaluates to zero. That is,

$$\left. \frac{\partial f}{\partial x_i} \right|_{x_i=x_i^*} = 0 \text{ for } i = 1, \dots, n.$$

**Lemma 1** Consider the non-zero function

$$f(x_1, \dots, x_n, y_1, \dots, y_m) = g(x_1, \dots, x_n)h(y_1, \dots, y_m).$$

Then  $x_1^*, \dots, x_n^*, y_1^*, \dots, y_m^*$  is a stationary point of  $f$  iff  $x_1^*, \dots, x_n^*$  is a stationary point of  $g$  and  $y_1^*, \dots, y_m^*$  is a stationary point of  $h$ .

**Proof** Consider the following elementary identities:

$$\begin{aligned} \frac{\partial f}{\partial x_i} &= g(x_1, \dots, x_n) \frac{\partial h}{\partial x_i} + h(y_1, \dots, y_m) \frac{\partial g}{\partial x_i} \\ &= h(y_1, \dots, y_m) \frac{\partial g}{\partial x_i} \\ \frac{\partial f}{\partial y_i} &= g(x_1, \dots, x_n) \frac{\partial h}{\partial y_i} + h(y_1, \dots, y_m) \frac{\partial g}{\partial y_i} \\ &= g(x_1, \dots, x_n) \frac{\partial h}{\partial y_i}. \end{aligned}$$

The lemma follows immediately from these identities since function  $f$  is non-zero (which implies that  $g$  and  $h$  are non-zero).  $\square$

## References

- [1] Adnan Darwiche. *Modeling and Reasoning with Bayesian Networks*. Cambridge University Press, 2009.
